# Supplementary material for: Selective oxidation of styrene by H2O2 over novel supported palladium(ii)-based catalysts
Source: Royal Society of Chemistry journal article supplement (doi:10.1039/d2nj05834k), 2023-01-01
Supplement: d2nj05834k1.pdf [file d2nj05834k1.pdf]

Electronic Supplementary Material (ESI) for New Journal of Chemistry.  
This journal is © The Royal Society of Chemistry 2023

## Supporting information

### Selective Oxidation of Styrene by H<sub>2</sub>O<sub>2</sub> over Novel Supported

#### Palladium(II)-based catalysts

Yuchan Han <sup>1</sup>, Li Wu <sup>1</sup>, Qi Han <sup>1</sup>, Rongfan Zhang <sup>1</sup>, Jun Li <sup>1\*</sup>

<sup>1</sup> School of Chemical and Environmental Engineering, Shanghai Institute of  
Technology, Shanghai 201418, China

\* Corresponding author. E-mail address: lij05@sit.edu.cn (J. Li).

### 1. Synthesis of SBA-15

The synthesis of SBA-15 has been achieved using known procedure reported by Zhao D Y and co-workers with minor revision<sup>[1]</sup>. In a 500 mL three-necked flask, 4 g P123 and 120 g 2 mol/L hydrochloric acid were dissolved in 30 g deionized water, stirring in a 38 °C water bath for 2 h. Then 8.4 g tetraethyl orthosilicate was dripped into the solution with stirring at 38 °C for 24 h. The white emulsion was transferred to a Teflon-lined autoclave. The autoclave was then sealed and heated to 100 °C for 36 h in oven. After the reaction, the mixture in the autoclave was cooled to room temperature. The solid was filtered off and washed with deionized water and absolute ethanol, and dried at 120 °C for 12 h, the obtained solid was calcined at 550 °C for 6 h to obtain SBA-15.

### 2. Synthesis of GO

Graphene oxide (GO) was prepared from graphite powder by a modified Hummer's method in our group<sup>[2]</sup>.

### 3. Synthesis of bis-imine ligands (B)

Take a 250 mL round bottom flask with a condensation circulation device, weigh 1.073g (8 mmol) of isophthalaldehyde and 3.75 mL (16 mmol) of 3-aminopropyltriethoxysilane, and dissolve them in 100 mL of absolute ethanol. Under the protection of nitrogen, condensate and reflux at 70 °C for 12 hours. After the reaction, ethanol was dried by vacuum distillation and vacuum drying for 12 h to obtain bis-imine ligands (B). <sup>1</sup>H-NMR (CDCl<sub>3</sub>, δ ppm): 8.23 (s, 2H), 7.97 (s, 1H), 7.72 (d, 2H), 7.37 (t, 1H), 3.75 (q, 12H), 3.56 (t, 4H), 1.77 (m, 4H), 1.16 (m, 18H), 0.61 (t, 4H); <sup>13</sup>C-NMR (CDCl<sub>3</sub>, δ ppm): 160.17, 136.61, 129.61, 128.60, 127.76, 64.01, 58.11, 24.10, 18.12, 7.89.

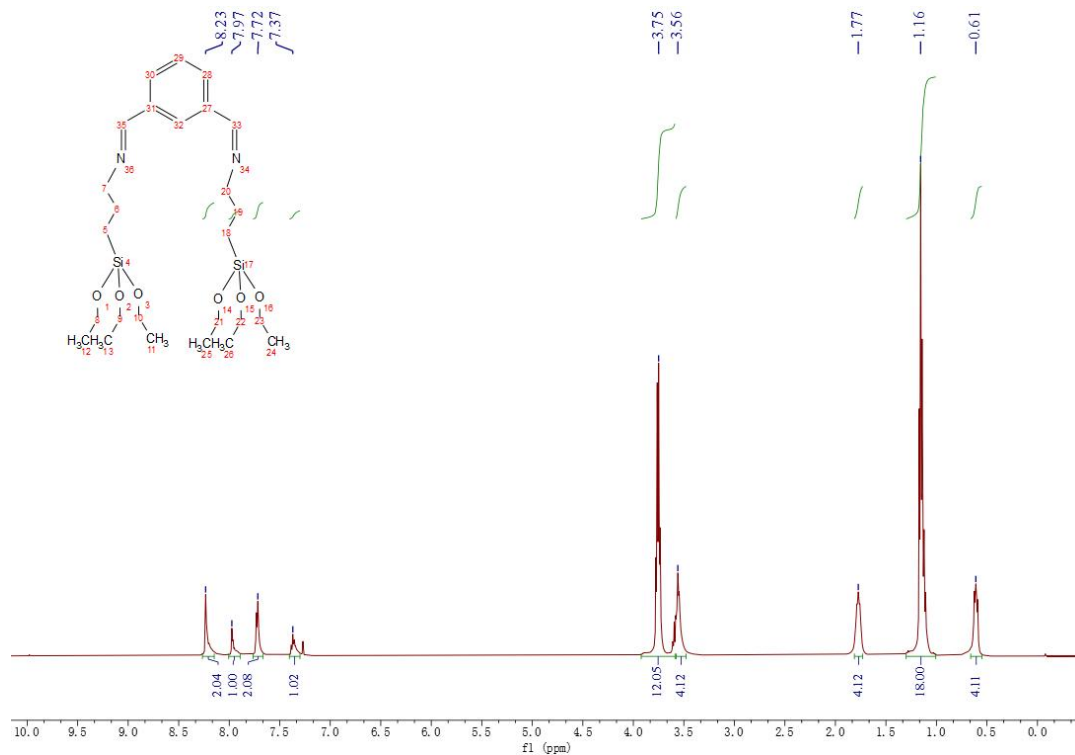

Fig. A1  $^1\text{H-NMR}$  spectra of diimine ligand B

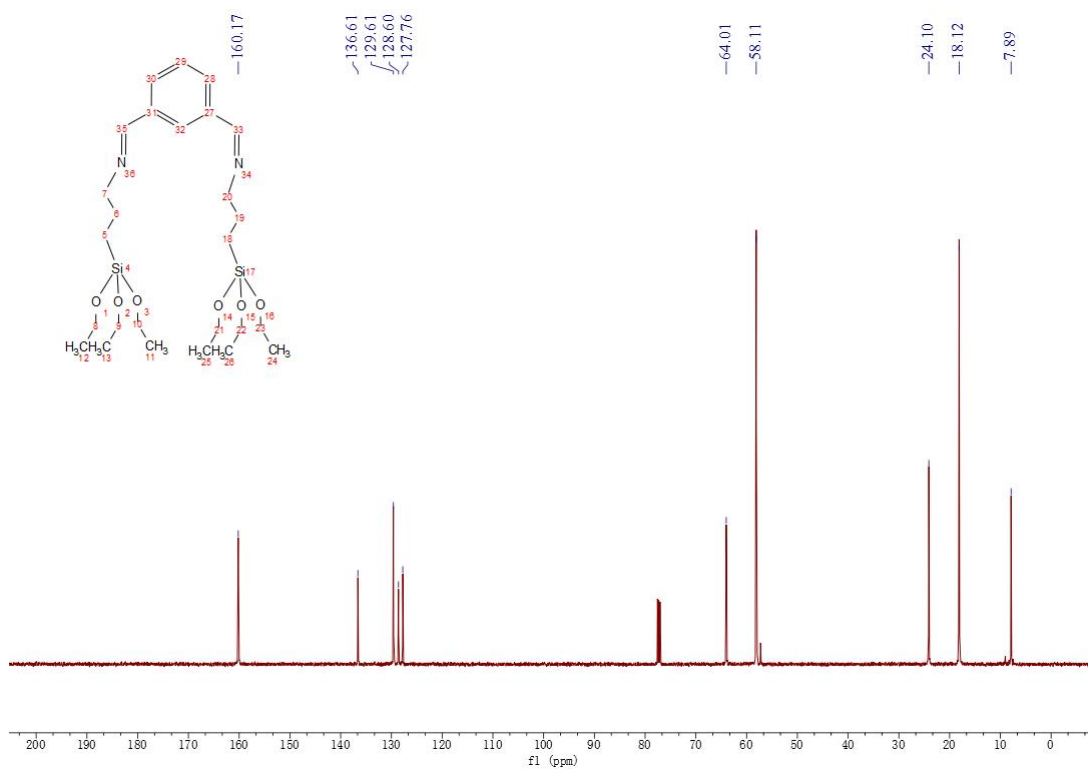

Fig. A2  $^{13}\text{C-NMR}$  spectra of diimine ligand B

#### 4. SEM Characterization

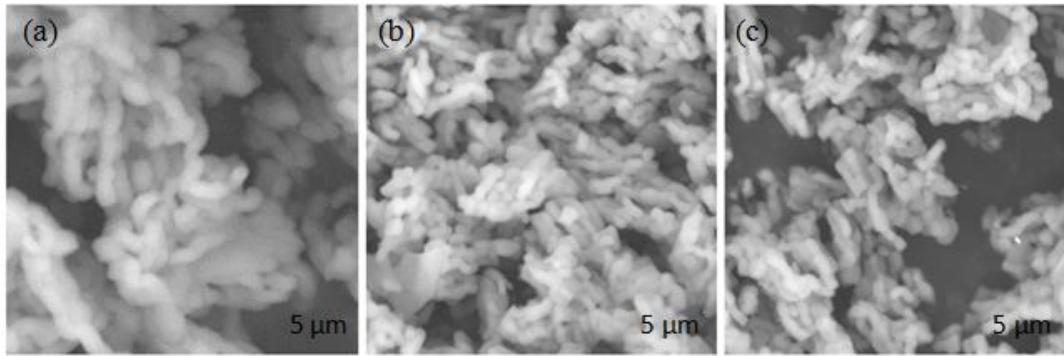

Fig. 2 SEM of SBA-15, SBA-15-B and SBA-15-B-Pd

The SEM images of SBA-15, SBA-15-B and SBA-15-B-Pd(II) are presented in Fig.2. No much difference was found with the above image. All the samples display good long rice-grain morphology, demonstrating high stability of the SBA-15 mesoporous structure. The modification of the ligand and the loading of metal palladium did not change the morphology of the mesoporous material.

## 5. N<sub>2</sub> Adsorption/Desorption Characterization

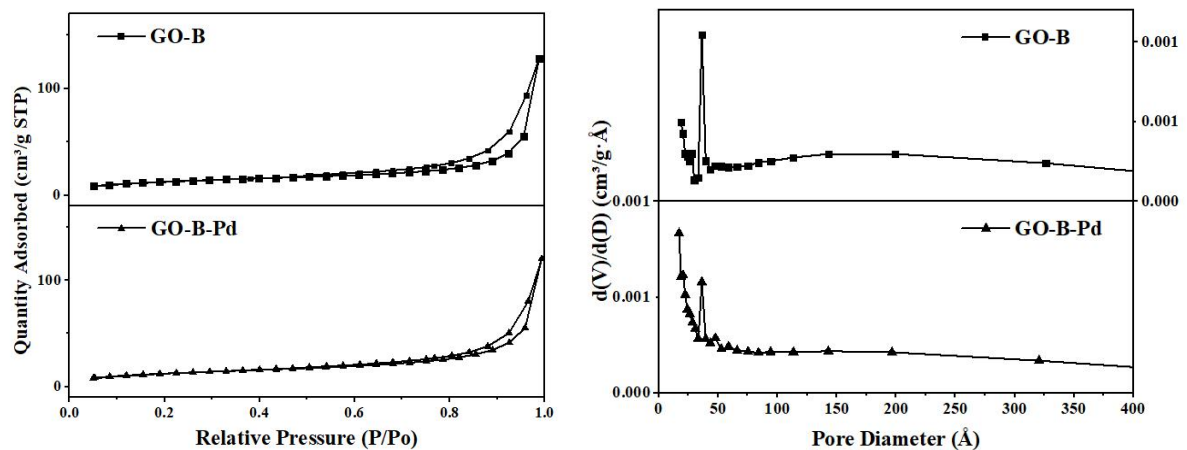

Fig. 3 N<sub>2</sub> adsorption/desorption curves and pore size distribution curves of GO-B and GO-B-Pd

## References

- [1] D. Y. Zhao, J. Feng, Q. Huo, N. Melosh, G. H. Fredrickson, B. F. Chmelka and G. D. Stucky, *ence.*, 1998, 279, 548-52.
- [2] J. Gao, S. Zhang, X. Zhang, C. Yu, H. Ye, Y. Qian and H. Song, *RSC Adv.*, 2012,5, 3954–3958.
